# Supplementary material for: Exploring the translational potential of PLGA nanoparticles for intra-articular rapamycin delivery in osteoarthritis therapy
Source: PubMed Central journal article supplement (PMC10548624; doi:10.1186/s12951-023-02118-4), 2023-10-04
Supplement: 12951_2023_2118_MOESM1_ESM.pdf [file 12951_2023_2118_MOESM1_ESM.pdf]

# Exploring the Translational Potential of PLGA Nanoparticles for Intra-articular Rapamycin Delivery in Osteoarthritis Therapy

Jian-Chao Ma<sup>1</sup>, Tingting Luo<sup>1</sup>, Binyang Feng<sup>1</sup>, Zicheng Huang<sup>1</sup>, Yiqing Zhang<sup>1</sup>, Hanqing Huang<sup>1</sup>, Xiao Yang<sup>1</sup>, Jing Wen<sup>1</sup>, Xiaochun Bai<sup>1,\*</sup>, Zhong-Kai Cui<sup>1,\*</sup>

<sup>1</sup> Department of Cell Biology, School of Basic Medical Sciences, Southern Medical University, Guangzhou, 510515, China

\*Correspondence:

Xiaochun Bai, [baixc15@smu.edu.cn](mailto:baixc15@smu.edu.cn)

Zhong-Kai Cui, [zhongkaicui@smu.edu.cn](mailto:zhongkaicui@smu.edu.cn)

**Table S1.** List of primer sequences.

| Gene           | Forward primer (5'to3') | Reverse primer (5'to3')  |
|----------------|-------------------------|--------------------------|
| <i>Col2a1</i>  | CTGGTGGAGCAGCAAGAGCAA   | CAGTGGACAGTAGACGGAGGAAAG |
| <i>Sox9</i>    | AGGAGAGCGAGGAAGATAAG    | ACGTGTGGCTTGTTCTTG       |
| <i>Mmp13</i>   | CAGTTGACAGGCTCCGAGAA    | CGTGTGCCAGAAGACCAGAA     |
| <i>β-actin</i> | GGGACCTGACTGACTACCTC    | TCATACTCCTGCTTGCTGAT     |

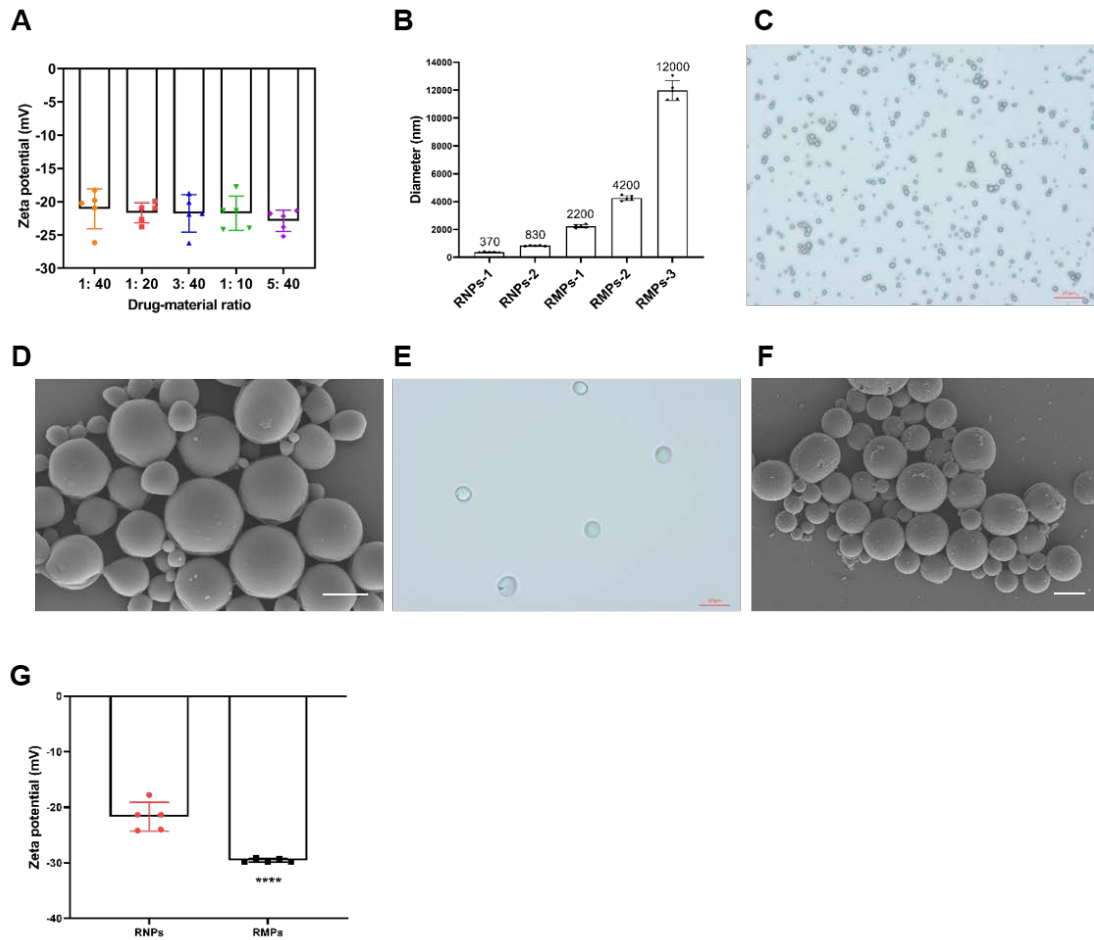

**Figure S1.** Preparation and characterization of RNPs and RMPs. (A) Zeta potential of RNPs with different drug-to-material ratios. (B) Average diameter of RNPs and RMPs (0.5% PVA concentration, drug-to-material ratio of 1:10). Average diameter of RNPs-1, RNPs-2, RMPs-1, RMPs-2 and RMPs-3 measured by dynamic light scattering. Average diameter of RMPs-4 obtained from Scanning Electron Micrograph measured by Image J (n = 3). (C) Upright light microscope image of RMPs-1, Scale Bar 20  $\mu\text{m}$ . (D) Scanning Electron Micrograph of RMPs-1, Scale Bar 2  $\mu\text{m}$ . (E) Upright light microscope image of RMPs-3, Scale Bar 20  $\mu\text{m}$ . (F) Scanning Electron Micrograph of RMPs-3, Scale Bar 10  $\mu\text{m}$ . (G) Zeta potential of RNPs and RMPs-1 (0.5% PVA concentration, drug-to-material ratio of 1:10).

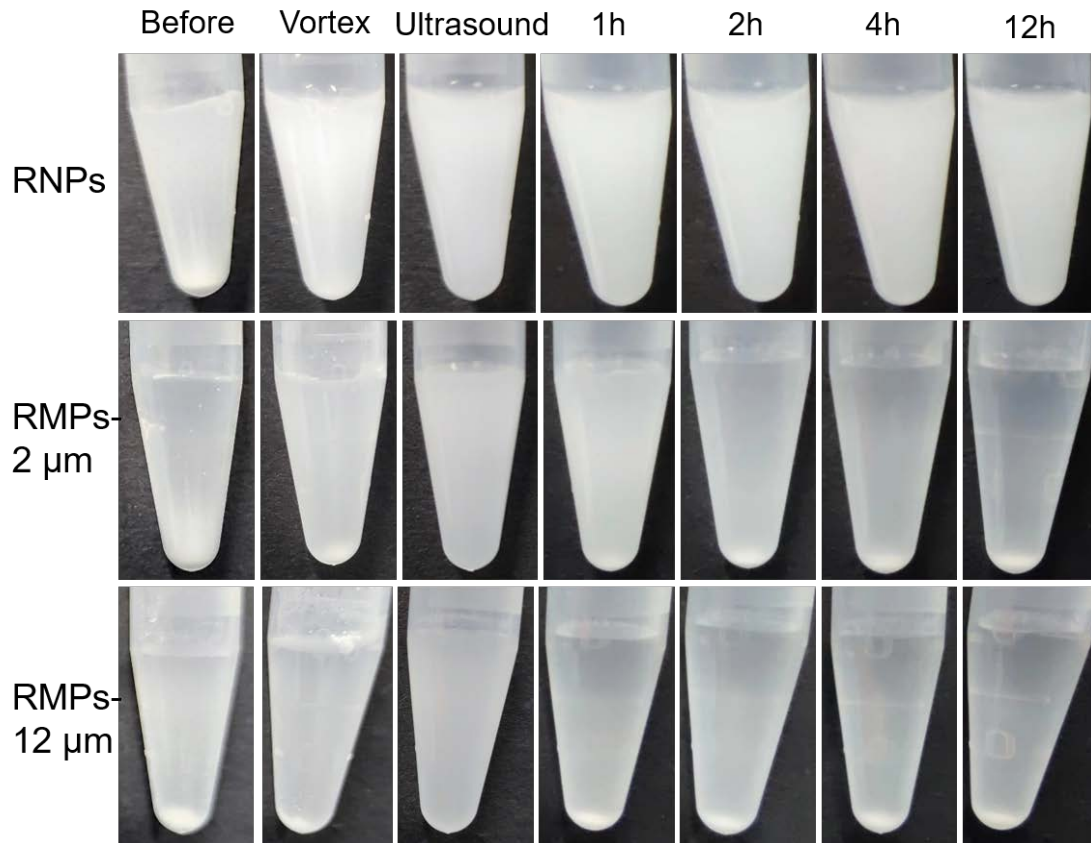

**Figure S2.** Stability of RNPs and RMPs suspended in physiological saline. Photographs in sequence showing the suspensions before vortex or ultrasound, after vortex, after ultrasound, 1, 2, 4, and 12 h after ultrasound, respectively.

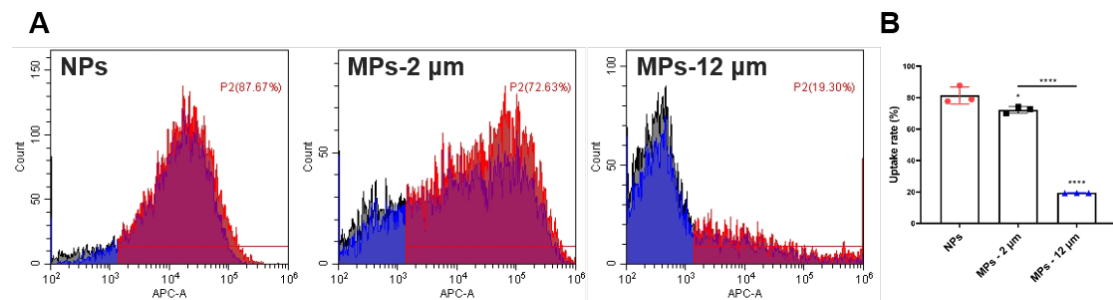

**Figure S3.** *In vitro* cellular uptake. Cellular uptake of RNPs and RMPs by flow cytometry in RAW 264.7 cells ( $n = 3$ ). Statistical analysis was performed using one-way ANOVA with Tukey's *post hoc* analysis. Data are presented as means  $\pm$  SD. \* $P < 0.05$ , \*\* $P < 0.01$ , \*\*\* $P < 0.001$ , \*\*\*\* $P < 0.0001$ .

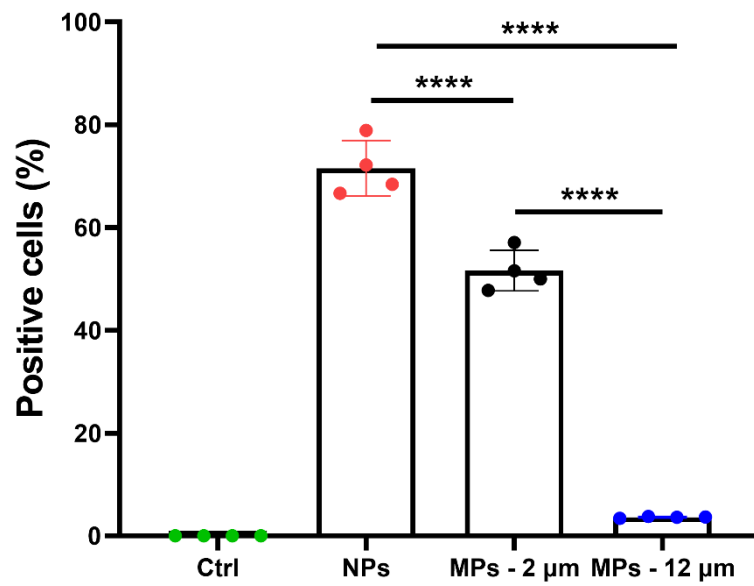

**Figure S4.** Quantification of RNPs and RMPs visualized by CLSM in mouse primary articular chondrocytes, data are presented as means  $\pm$  SD. \*\*\*\* $P < 0.0001$ , (n = 4).

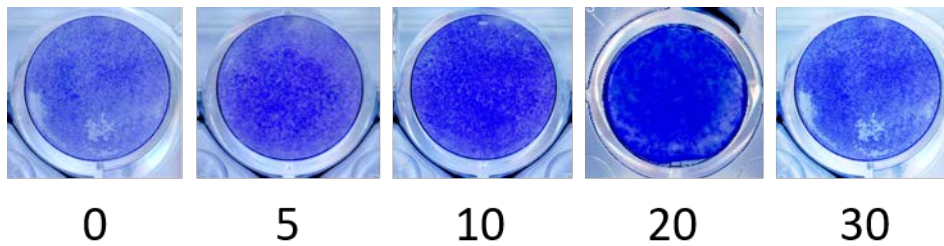

**Figure S5.** Toluidine blue staining of ATDC5 cells cultured in chondrogenic medium for 7 days treated with 0, 5, 10, 20 and 30 nM rapamycin, respectively.

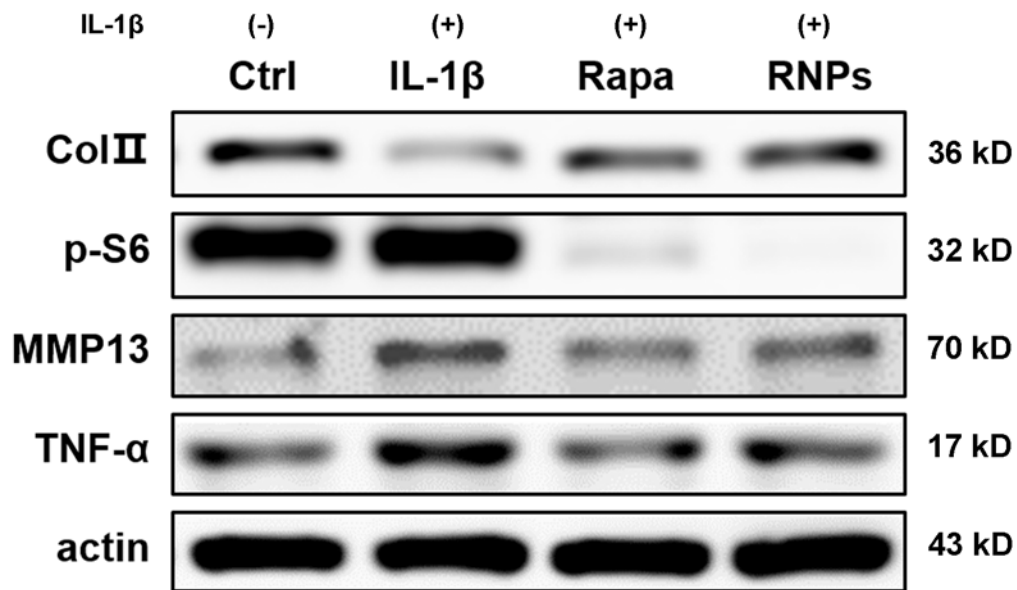

**Figure S6.** The expression of proteins (Col II, p-S6, MMP13 and TNF- $\alpha$ ) in SW1353, which were induced with IL-1 $\beta$  for 24 h.

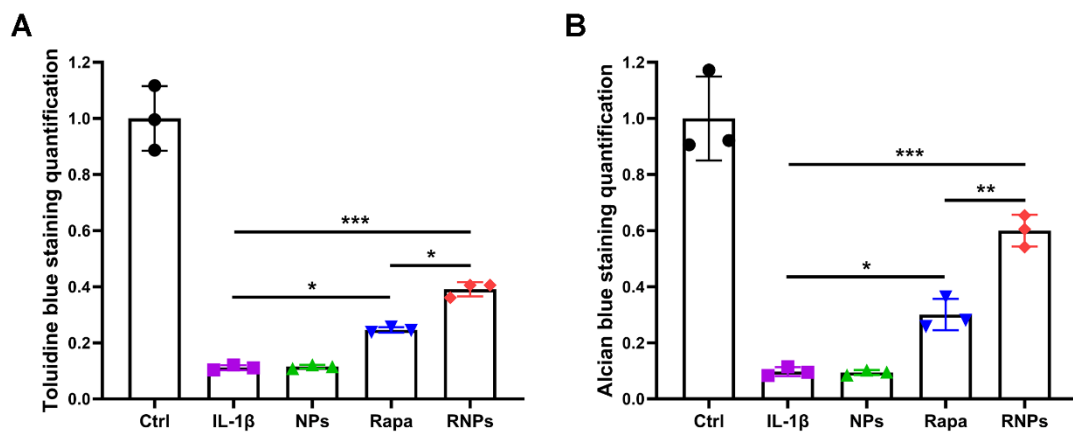

**Figure S7.** Quantification of Toluidine blue and Alcian blue staining, data are presented as means  $\pm$  SD. \* $P < 0.05$ , \*\* $P < 0.01$ , \*\*\* $P < 0.001$ , (n = 3).

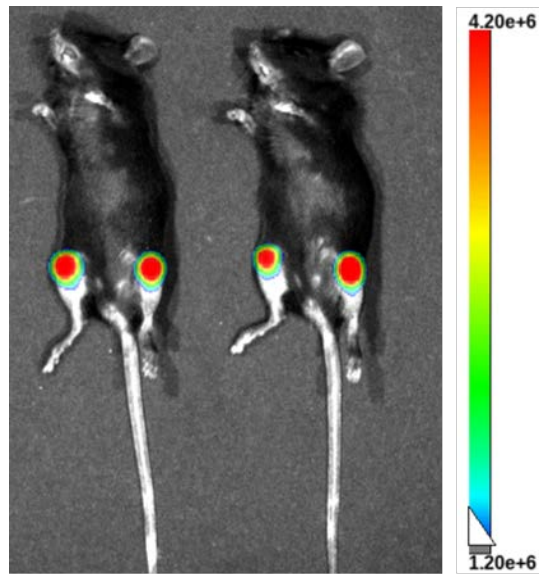

**Figure S8.** Distribution of fluorescence signals after 24 h of injecting PLGA nanoparticles.

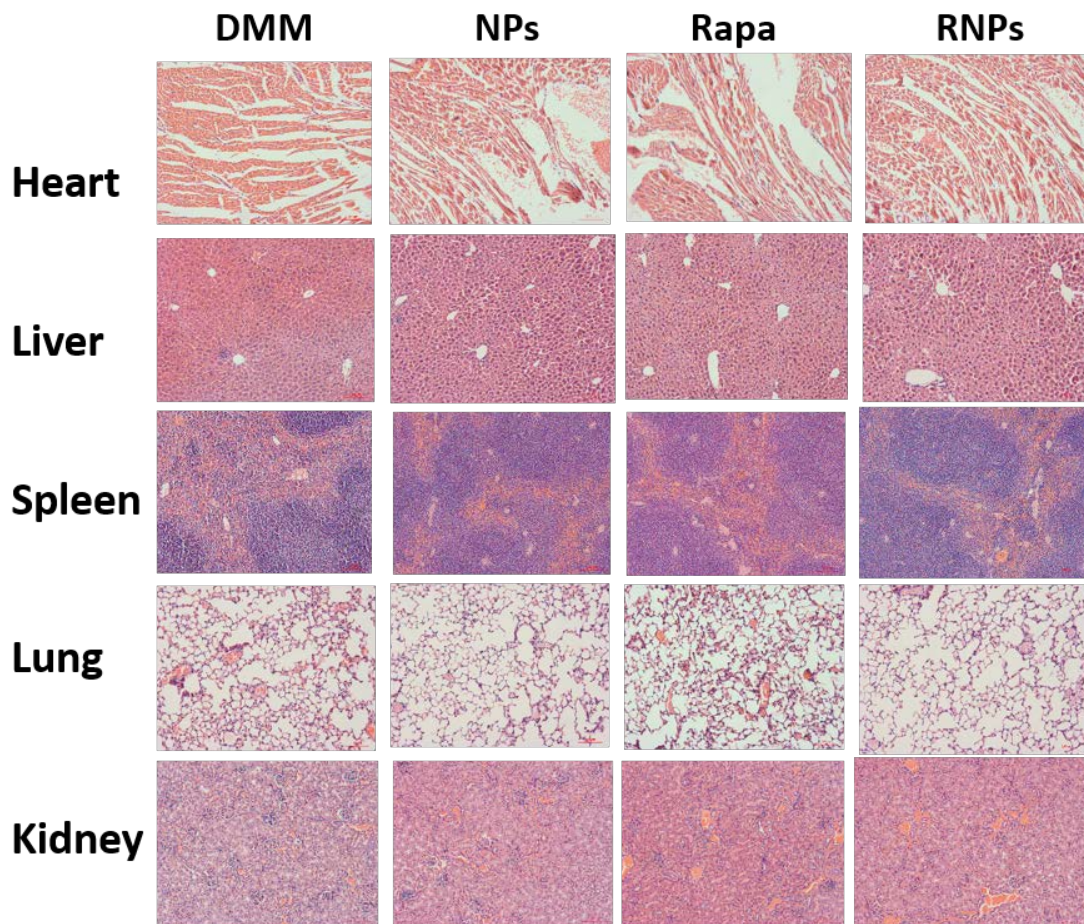

**Figure S9.** Hematoxylin and eosin staining of heart, liver, spleen, lung and kidney harvested from mice at week 8 post surgery.
